# Supplementary material
Source: ML conference proceedings conference paper supplement (https://openaccess.thecvf.com/content/ICCV2025/html/Zhu_SegmentDreamer_Towards_High-fidelity_ICCV_2025_paper.html)
Supplement: Supplementary file 1 [file Zhu_SegmentDreamer_Towards_High-fidelity_ICCV_2025_supplemental.pdf]

# SegmentDreamer: Towards High-fidelity Text-to-3D Synthesis with Segmented Consistency Trajectory Distillation

## Supplementary Material

To provide proofs of SegmentDreamer and visual comparisons of state-of-the-arts, this supplementary material includes the following contents:

- Section A: Guided Consistency Sampling Loss
- Section B: Flaws in the Consistency Function of Guided Consistency Sampling
- Section C: Oversaturation and Artifacts in GCS
- Section D: How to Connect SCTD with SDS
- Section E: Computation Reduction Trick
- Section F: Proof of Upper Bound of Distillation Error
- Section G: Visual Comparisons of State-of-the-arts

### A. Guided Consistency Sampling Loss

The Guided Consistency Sampling (GCS) loss [2] is composed of a compact consistency loss  $\mathcal{L}_{CC}$ , a conditional guidance loss  $\mathcal{L}_{CG}$ , and a pixel-wise constraint loss  $\mathcal{L}_{CP}$ , which are defined by

$$\begin{aligned}\mathcal{L}_{CC}(\theta) &= \mathbb{E}[\|G_\theta(\tilde{z}_t^\Phi, t, e, \emptyset) - G_\theta(\tilde{z}_s^\Phi, s, e, \emptyset)\|_2^2], \\ \mathcal{L}_{CG}(\theta) &= \mathbb{E}[\|F_\theta(z_e, e, \emptyset) - F_\theta(G_\theta(\tilde{z}_t^\Phi, t, e, y), e, \emptyset)\|_2^2], \\ \mathcal{L}_{CP}(\theta) &= \mathbb{E}[\|D(F_\theta(z_e, e, \emptyset)) - D(F_\theta(G_\theta(\tilde{z}_t^\Phi, t, e, y), e, y))\|_2^2],\end{aligned}\quad (1)$$

where  $e < s < t$ ,  $\tilde{z}_t^\Phi$  is estimated by the following trajectory:  $z_e = \alpha_t z_0 + \sigma_t \epsilon^* \rightarrow \tilde{z}_s^\Phi = \Phi(z_e, e, s, \emptyset) \rightarrow \tilde{z}_t^\Phi = \Phi(\tilde{z}_s^\Phi, s, t, \emptyset)$ ,  $\tilde{z}_s^\Phi = \Phi(\tilde{z}_t^\Phi, t, s, y)$ , and  $D$  denotes the VAE decoder.

### B. Flaws in the Consistency Function of Guided Consistency Sampling

As we know, given a well-trained diffusion model  $\phi$ , there exists an exact solution from timestep  $t$  to  $e$  [5]:

$$G(z_t, t, e, y) = \frac{\alpha_e}{\alpha_t} z_t + \alpha_s \int_{\lambda_t}^{\lambda_e} e^{-\lambda} \epsilon_\phi(z_{t_\lambda(\lambda)}, t_\lambda(\lambda), y) d\lambda, \quad (2)$$

where  $\lambda_t = \ln \frac{\alpha_t}{\sigma_t}$  and  $t_\lambda$  denotes the inverse function of  $\lambda_t$ . Inspired by [8], we find Eq. (6) suggests that GCS aims to optimize a 3D representation  $\theta$  such that  $G_\theta(z_t, t, e, \emptyset) = G_\theta(\tilde{z}_s^\Phi, s, e, \emptyset)$  for  $\forall t, s, e \in [0, T]$  where  $t > s > e$ . This implies  $\epsilon_\phi(z_t, t, y)$ , as defined in Eq. (5), is not an approximation but an exact solution learning related to the 3D representation  $\theta$ , i.e.,  $\epsilon_\phi(z_t, t, y) = \frac{\int_{\lambda_t}^{\lambda_e} e^{-\lambda} \epsilon_\phi(z_{t_\lambda(\lambda)}, t_\lambda(\lambda), y) d\lambda}{\int_{\lambda_t}^{\lambda_e} e^{-\lambda} d\lambda}$ . However, dropping the target timestep  $e$  in  $\epsilon_\phi(z_t, t, y)$ , as GCS does, is problematic.

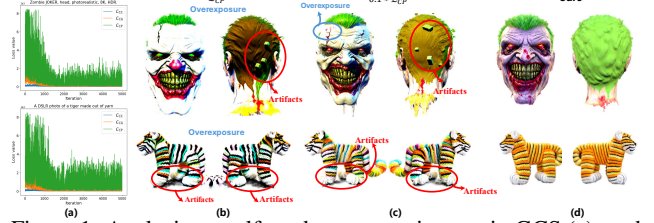

Figure 1. Analysis on self- and cross-consistency in GCS (a), and visual analysis of oversaturation and artifacts (b)-(d).

Suppose we predict both  $z_e$  and  $z_{e'}$  from  $z_t$  where  $t > e' > e$ , we must have

$$\begin{aligned}\epsilon_\phi(z_t, t, y) &= \frac{\int_{\lambda_t}^{\lambda_{e'}} e^{-\lambda} \epsilon_\phi(z_{t_\lambda(\lambda)}, t_\lambda(\lambda), y) d\lambda}{\int_{\lambda_t}^{\lambda_{e'}} e^{-\lambda} d\lambda} \\ \epsilon_\phi(z_t, t, y) &= \frac{\int_{\lambda_t}^{\lambda_e} e^{-\lambda} \epsilon_\phi(z_{t_\lambda(\lambda)}, t_\lambda(\lambda), y) d\lambda}{\int_{\lambda_t}^{\lambda_e} e^{-\lambda} d\lambda}.\end{aligned}\quad (3)$$

Clearly, without the target timestep in  $\epsilon_\phi(z_t, t, y)$ , optimizing a 3D representation  $\theta$  to satisfy both conditions in Eq. (3) for all intervals  $[e, t]$  is invalid. For GCS, as the number of training steps increases, the above unreasonable phenomena occur frequently, potentially resulting in poor distillation results.

### C. Oversaturation and Artifacts in GCS

Fig. 1 shows that the cross-consistency loss  $\mathcal{L}_{CG} + \mathcal{L}_{CP}$  (with  $\mathcal{L}_{CP}$  dominating) greatly exceeds the self-consistency loss  $\mathcal{L}_{CC}$ . As shown in Fig. 1, we scale down  $\mathcal{L}_{CP}$  (c) and observe that the oversaturation (b) is alleviated, but undesirable geometry persists (red circle). This suggests that such oversaturation is brought from an excessively large value of cross-consistency loss, i.e., the “excessive conditional guidance,” which has been analyzed in Sec. 4.1. In contrast, our  $\mathcal{L}_{SCTD}$  (d) successfully addresses the above issues.

### D. How to Connect SCTD with SDS?

As described in Sec. 4.3, given any subtrajectory  $[s_m, s_{m+1}]$ ,  $G_\theta(z_t, t, s_m, y) := G_\theta^m(z_t, t, y) = \frac{\alpha_{s_m}}{\alpha_t} z_t - \alpha_{s_m} \epsilon_\phi(z_t, t, y) \int_{\lambda_t}^{\lambda_{s_m}} e^{-\lambda} d\lambda$ . Then, we have

$$\epsilon_\phi(z_t, t, y) = \frac{G_\theta^m(z_t, t, y) - \frac{\alpha_{s_m}}{\alpha_t} z_t}{\alpha_{s_m} \int_{\lambda_t}^{\lambda_{s_m}} e^{-\lambda} d\lambda}, \quad (4)$$

where  $z_t = \alpha_t z_0 + \sigma_t \epsilon$ . In this case,  $y$  can represent any prompt embedding, including  $\emptyset$ . According to Eq. (7),  $\mathcal{L}_{SDS}$

can be further transformed into:

$$\begin{aligned} \hat{\epsilon}_\phi(\mathbf{z}_t, t, \mathbf{y}) - \epsilon &= \epsilon_\phi(\mathbf{z}_t, t, \mathbf{y}) - \epsilon - \mathbf{G}_\theta^m(\hat{\mathbf{z}}_s^\Phi, s, \mathbf{y}) + \\ &\mathbf{G}_\theta^m(\hat{\mathbf{z}}_s^\Phi, s, \mathbf{y}) + \omega(\epsilon_\phi(\mathbf{z}_t, t, \mathbf{y}) - \epsilon_\phi(\mathbf{z}_t, t, \emptyset)), \end{aligned} \quad (5)$$

where  $\hat{\mathbf{z}}_s^\Phi = \Phi(\mathbf{z}_t, t, s, \mathbf{y})$ . By substituting Eq. (4) into Eq. (5), we obtain

$$\begin{aligned} \mathcal{L}_{\text{SDS}}(\theta) &= \mathbb{E}_t[b(t) \|\mathbf{G}_\theta^m(\hat{\mathbf{z}}_s^\Phi, s, \mathbf{y}) - \mathbf{G}_\theta^m(\mathbf{z}_t, t, \mathbf{y}) \\ &+ \omega(\mathbf{G}_\theta^m(\mathbf{z}_t, t, \emptyset) - \mathbf{G}_\theta^m(\mathbf{z}_t, t, \mathbf{y})) - \mathbf{G}_\theta^m(\hat{\mathbf{z}}_s^\Phi, s, \mathbf{y}) \\ &+ \frac{\alpha_{s_m}}{\alpha_t} \mathbf{z}_t - \alpha_{s_m} \int_{\lambda_t}^{\lambda_{s_m}} e^{-\lambda} d\lambda \epsilon\|_2^2], \end{aligned} \quad (6)$$

where  $b(t) = \frac{\omega(t)}{(\alpha_{s_m} \int_{\lambda_t}^{\lambda_{s_m}} e^{-\lambda} d\lambda)^2}$ . Furthermore,

$$\begin{aligned} &\frac{\alpha_{s_m}}{\alpha_t} \mathbf{z}_t - \alpha_{s_m} \int_{\lambda_t}^{\lambda_{s_m}} e^{-\lambda} d\lambda \epsilon \\ &= \frac{\alpha_{s_m}}{\alpha_t} (\alpha_t \mathbf{z}_0^\mathbf{c} + \sigma_t \epsilon) + \alpha_{s_m} (e^{\lambda_{s_m} - \lambda_t} - 1) \epsilon \\ &= \alpha_{s_m} \mathbf{z}_0 + \sigma_{s_m} \epsilon \\ &= \mathbf{z}_{s_m} \end{aligned} \quad (7)$$

Substituting Eq. (7) into Eq. (6), we can obtain Eq. (8). Proof is completed.

## E. Computation Reduction Trick

Eq. (7) can be transformed into

$$\begin{aligned} \hat{\epsilon}_\phi(\mathbf{z}_t, t, \mathbf{y}) - \epsilon &= \epsilon_\phi(\mathbf{z}_t, t, \mathbf{y}) - \epsilon + \omega(\epsilon_\phi(\mathbf{z}_t, t, \mathbf{y}) - \epsilon_\phi(\mathbf{z}_t, t, \emptyset)) \\ &= \epsilon_\phi(\mathbf{z}_t, t, \emptyset) - \epsilon + (\omega + 1)(\epsilon_\phi(\mathbf{z}_t, t, \mathbf{y}) - \epsilon_\phi(\mathbf{z}_t, t, \emptyset)) \end{aligned} \quad (8)$$

Based on Eq. (8), we can readily derive Eq. (9) by following the procedure described in App. D.

## F. Proof of Upper Bound of Distillation Error

Before proving Theorem 1, we first give the following lemma:

**Lemma 1.** *Given a sub-trajectory  $[s_m, s_{m+1}]$ , let  $\Delta t = \max_{t, s \in [s_m, s_{m+1}]} \{t - s\}$ . We assume  $\mathbf{G}_\theta^m$  satisfies the Lipschitz condition and the ODE solver has local error uniformly bounded by  $O(t - s)^{p+1}$  with  $p \geq 1$ . If  $\mathbf{G}_\theta^m(\tilde{\mathbf{z}}_t^\Phi, t, \emptyset) = \mathbf{G}_\theta^m(\tilde{\mathbf{z}}_s^\Phi, s, \emptyset)$  for  $\forall t, s \in [s_m, s_{m+1}]$ , we have*

$$\begin{aligned} &\sup_{t, s \in [s_m, s_{m+1}]} \|\mathbf{G}_\theta^m(\tilde{\mathbf{z}}_t^\Phi, t, \mathbf{y}) - \Phi(\tilde{\mathbf{z}}_t^\Phi, t, s_m, \mathbf{y})\| \\ &= O((\Delta t)^p)(s_{m+1} - s_m). \end{aligned} \quad (9)$$

*Proof.* The proof is based on [2, 7–9]. Let

$$e_{n-1} := \mathbf{G}_\theta^m(\tilde{\mathbf{z}}_s^\Phi, s, \mathbf{y}) - \Phi(\tilde{\mathbf{z}}_s^\Phi, s, s_m, \mathbf{y}), \quad (10)$$

where  $\tilde{\mathbf{z}}_s^\Phi = \Phi(\mathbf{z}_{s_m}^\mathbf{c}, s_m, s, \mathbf{y})$ . According to the condition, we have

$$\begin{aligned} e_n &= \mathbf{G}_\theta^m(\tilde{\mathbf{z}}_t^\Phi, t, \mathbf{y}) - \Phi(\tilde{\mathbf{z}}_t^\Phi, t, s_m, \mathbf{y}) \\ &= \mathbf{G}_\theta^m(\tilde{\mathbf{z}}_s^\Phi, s, \mathbf{y}) - \mathbf{G}_\theta^m(\tilde{\mathbf{z}}_s^\Phi, s, \mathbf{y}) \\ &+ \mathbf{G}_\theta^m(\tilde{\mathbf{z}}_s^\Phi, s, \mathbf{y}) - \Phi(\tilde{\mathbf{z}}_s^\Phi, s, s_m, \mathbf{y}) \\ &= \mathbf{G}_\theta^m(\tilde{\mathbf{z}}_s^\Phi, s, \mathbf{y}) - \mathbf{G}_\theta^m(\tilde{\mathbf{z}}_s^\Phi, s, \mathbf{y}) + e_{n-1}, \end{aligned} \quad (11)$$

Provided that  $\mathbf{G}_\theta^m$  satisfies  $L$ -Lipschitz condition, we have

$$\begin{aligned} \|e_n\| &= \|e_{n-1} + \mathbf{G}_\theta^m(\tilde{\mathbf{z}}_s^\Phi, s, \mathbf{y}) - \mathbf{G}_\theta^m(\tilde{\mathbf{z}}_s^\Phi, s, \mathbf{y})\| \\ &\leq \|e_{n-1}\| + \|\mathbf{G}_\theta^m(\tilde{\mathbf{z}}_s^\Phi, s, \mathbf{y}) - \mathbf{G}_\theta^m(\tilde{\mathbf{z}}_s^\Phi, s, \mathbf{y})\| \\ &\leq e_{n-1} + L \|\tilde{\mathbf{z}}_s^\Phi - \tilde{\mathbf{z}}_s^\Phi\| \\ &\leq e_{n-1} + L \cdot O((t - s)^{p+1}) \\ &\leq e_{n-1} + L(t - s) \cdot O((\Delta t)^p). \end{aligned} \quad (12)$$

Besides, according to the boundray condition,

$$\begin{aligned} e_{s_m} &= \mathbf{G}_\theta^m(\tilde{\mathbf{z}}_{s_m}^\Phi, s_m, \mathbf{y}) - \Phi(\tilde{\mathbf{z}}_{s_m}^\Phi, s_m, s_m, \mathbf{y}) \\ &= \tilde{\mathbf{z}}_{s_m}^\Phi - \tilde{\mathbf{z}}_{s_m}^\Phi = \mathbf{z}_{s_m}^\mathbf{c} - \mathbf{z}_{s_m}^\mathbf{c} = 0, \end{aligned} \quad (13)$$

Therefore,

$$\begin{aligned} \|e_n\| &\leq \|e_{s_m}\| + L \sum_{t_i, t_{i-1} \in [s_m, s_{m+1}]} (t_i - t_{i-1}) O((\Delta t)^p) \\ &= O((\Delta t)^p) \cdot (s_{m+1} - s_m). \end{aligned} \quad (14)$$

The proof is completed.  $\square$

According to Eq. (12), one can ideally optimize a 3D model  $\theta$  such that  $\mathbf{z}_{s_m} = \mathbf{G}_\theta^m(\tilde{\mathbf{z}}_t^\Phi, t, \mathbf{y})$ . In this case, we have  $\Phi(\tilde{\mathbf{z}}_s^\Phi, s, s_m, \mathbf{y}) = \mathbf{z}_{s_m}^{\text{data}}$ , where  $\mathbf{z}_{s_m}^{\text{data}} = \alpha_{s_m} \mathbf{z}^{\text{data}} + \sigma_{s_m} \epsilon^*$ . Based on this, we have

$$\|\mathbf{G}_\theta^m(\tilde{\mathbf{z}}_t^\Phi, t, \mathbf{y}) - \Phi(\tilde{\mathbf{z}}_t^\Phi, t, s_m, \mathbf{y})\| = \|\mathbf{z}_{s_m} - \mathbf{z}_{s_m}^{\text{data}}\| = \|\mathbf{z}_0 - \mathbf{z}^{\text{data}}\|. \quad (15)$$

Since we use a first-order ODE solver to implement  $\Phi$ , we have

$$\sup_{t, s \in [s_m, s_{m+1}]} \|\mathbf{z}_0 - \mathbf{z}^{\text{data}}\| = \mathcal{O}(\Delta t)(s_{m+1} - s_m). \quad (16)$$

The proof is completed.

## G. Visual Comparisons of State-of-the-arts

We also present additional visual comparisons with state-of-the-art methods, as shown in Fig. 2 and Fig. 3. We provide additional qualitative comparisons against DreamFusion [6], LucidDreamer [3], Consistent3D [9], ConnectCD [2], Magic3D [4], Fantasia3D [1], and CSD [10]. As shown, our method clearly outperforms others visually.

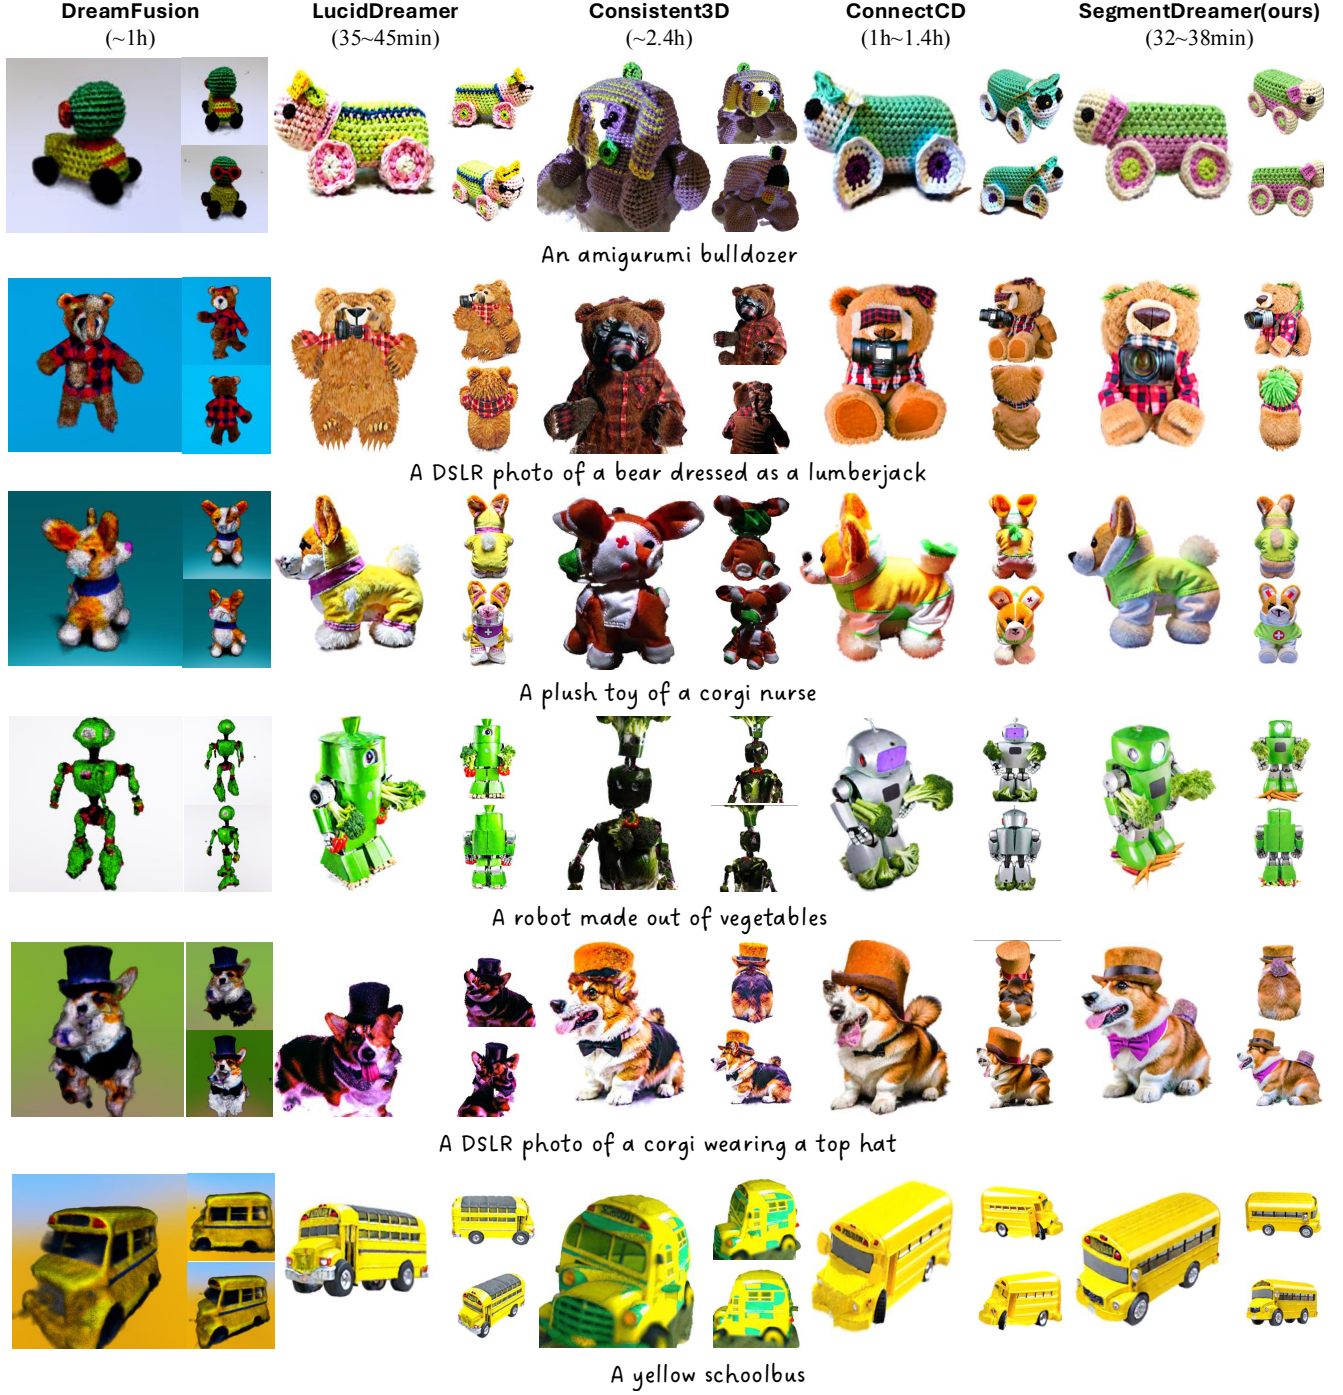

Figure 2. Additional qualitative comparisons with DreamFusion [6], LucidDreamer [3], Consistent3D [9], and ConnectCD [2]. CFG scales are set to 100, 7.5, 20~40, 7.5, 7.5, respectively. Our approach yields results with high quality. Please zoom in for details.

## References

- [1] Rui Chen, Yongwei Chen, Ningxin Jiao, and Kui Jia. Fantasia3d: Disentangling geometry and appearance for high-quality text-to-3d content creation. In *Proceedings of the International Conference on Computer Vision (ICCV)*, pages 22246–22256, 2023. 2
- [2] Zongrui Li, Minghui Hu, Qian Zheng, and Xudong Jiang. Connecting consistency distillation to score distillation for text-to-3d generation. In *Proceedings of the European Conference on Computer Vision (ECCV)*, pages 274–291. Springer, 2025. 1, 2, 3



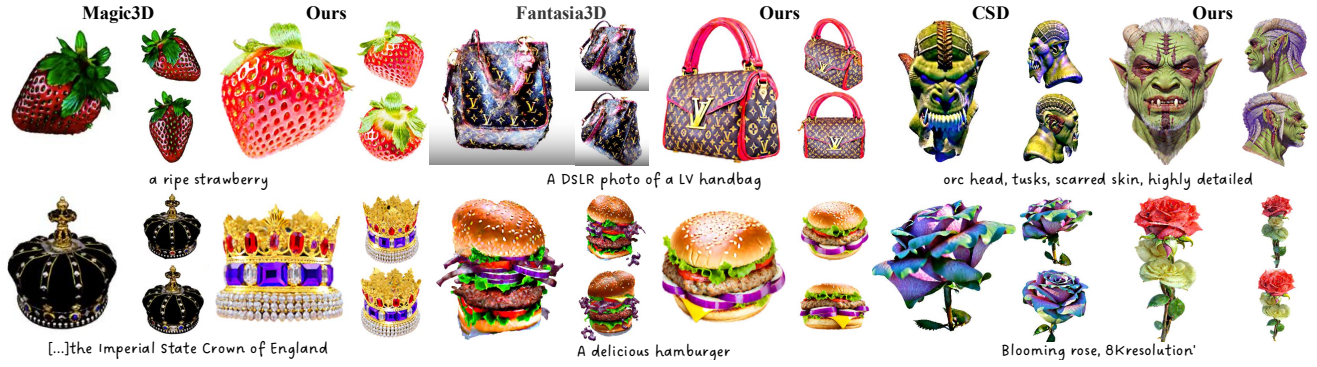

Figure 3. Additional qualitative comparisons with Magic3D [6], Fantasia3D [3], and CSD [9]. Our approach yields results with high quality. Please zoom in for details.

Table 1. 40 prompts for evaluation.

| Column 1                                                                            | Column 2                                                      |
|-------------------------------------------------------------------------------------|---------------------------------------------------------------|
| 1. A cat with a mullet                                                              | 21. A blue motorcycle                                         |
| 2. A pig wearing a backpack                                                         | 22. Michelangelo style statue of an astronaut                 |
| 3. A DSLR photo of an origami crane                                                 | 23. A DSLR photo of a chow chow puppy                         |
| 4. A photo of a mouse playing the tuba                                              | 24. A DSLR photo of cats wearing eyeglasses                   |
| 5. An orange road bike                                                              | 25. A red panda                                               |
| 6. A ripe strawberry                                                                | 26. A DSLR photo of an elephant skull                         |
| 7. A DSLR photo of the Imperial State Crown of England                              | 27. An amigurumi bulldozer                                    |
| 8. A photo of a wizard raccoon casting a spell                                      | 28. A typewriter                                              |
| 9. A DSLR photo of a corgi wearing a top hat                                        | 29. A red-eyed tree frog, low poly                            |
| 10. A rabbit, animated movie character, high-detail 3D model                        | 30. A DSLR photo of a chimpanzee wearing headphones           |
| 11. A panda rowing a boat                                                           | 31. A robot made out of vegetables                            |
| 12. A highly detailed sand castle                                                   | 32. A DSLR photo of a red rotary telephone                    |
| 13. A DSLR photo of a chimpanzee dressed like Henry VIII king of England            | 33. A DSLR photo of a blue lobster                            |
| 14. A photo of a skiing penguin wearing a puffy jacket, highly realistic DSLR photo | 34. A DSLR photo of a squirrel flying a biplane               |
| 15. A blue poison-dart frog sitting on a water lily                                 | 35. A DSLR photo of a baby dragon hatching out of a stone egg |
| 16. A DSLR photo of a bear dressed in medieval armor                                | 36. A DSLR photo of a bear dancing ballet                     |
| 17. A DSLR photo of a squirrel dressed like a clown                                 | 37. A plate of delicious tacos                                |
| 18. A plush toy of a corgi nurse                                                    | 38. A DSLR photo of a car made out of cheese                  |
| 19. A humanoid robot playing the violin                                             | 39. A yellow school bus                                       |
| 20. A DSLR photo of a bear dressed as a lumberjack                                  | 40. A DSLR photo of a shiny beetle                            |

[3] Yixun Liang, Xin Yang, Jiantao Lin, Haodong Li, Xiaogang Xu, and Yingcong Chen. Luciddreamer: Towards high-fidelity text-to-3d generation via interval score matching. In *Proceedings of the IEEE/CVF Conference on Computer Vision and Pattern Recognition (CVPR)*, pages 6517–6526, 2024. 2, 3, 4

[4] Chen-Hsuan Lin, Jun Gao, Luming Tang, Towaki Takikawa, Xiaohui Zeng, Xun Huang, Karsten Kreis, Sanja Fidler, Ming-Yu Liu, and Tsung-Yi Lin. Magic3d: High-resolution

text-to-3d content creation. In *Proceedings of the IEEE/CVF Conference on Computer Vision and Pattern Recognition (CVPR)*, pages 300–309, 2023. 2

[5] Cheng Lu, Yuhao Zhou, Fan Bao, Jianfei Chen, Chongxuan Li, and Jun Zhu. Dpm-solver: A fast ode solver for diffusion probabilistic model sampling in around 10 steps. In *Proceedings of the International Conference on Neural Information Processing Systems (NeurIPS)*, pages 5775–5787, 2022. 1

[6] Ben Poole, Ajay Jain, Jonathan T Barron, and Ben Mildenh-

- hall. Dreamfusion: Text-to-3d using 2d diffusion. In *Proceedings of the International Conference on Learning Representations (ICLR)*, pages 1–10, 2022. [2](#), [3](#), [4](#)
- [7] Yang Song, Prafulla Dhariwal, Mark Chen, and Ilya Sutskever. Consistency models. In *Proceedings of the International Conference on Machine Learning (ICLR)*, 2023. [2](#)
- [8] Fu-Yun Wang, Zhaoyang Huang, Alexander William Bergman, Dazhong Shen, Peng Gao, Michael Lingelbach, Keqiang Sun, Weikang Bian, Guanglu Song, Yu Liu, et al. Phased consistency model. In *Proceedings of the International Conference on Neural Information Processing Systems (NeurIPS)*, 2024. [1](#)
- [9] Zike Wu, Pan Zhou, Xuanyu Yi, Xiaoding Yuan, and Hanwang Zhang. Consistent3d: Towards consistent high-fidelity text-to-3d generation with deterministic sampling prior. In *Proceedings of the IEEE/CVF Conference on Computer Vision and Pattern Recognition (CVPR)*, pages 9892–9902, 2024. [2](#), [3](#), [4](#)
- [10] Xin Yu, Yuan-Chen Guo, Yangguang Li, Ding Liang, Song-Hai Zhang, and Xiaojuan Qi. Text-to-3d with classifier score distillation. In *Proceedings of the International Conference on Learning Representations (ICLR)*, 2024. [2](#)
